# Supplementary material
Source: publisher figshare collection journal article supplement (https://frontiersin.figshare.com/ndownloader/files/13865825)
Supplement: Supplementary file [file 13865825]

***Supplementary Material:***

**Identification and characterization of new  
resistance-conferring SGI1s (*Salmonella* genomic island 1) in  
*Proteus mirabilis***

Luyao Bie <sup>1</sup>, Meng Fang <sup>1</sup>, Zhiqiang Li <sup>2</sup>, Mingyu Wang<sup>1\*</sup> and Hai Xu<sup>1\*</sup>

<sup>1</sup> State Key Laboratory of Microbial Technology, Microbial Technology Research Institute, Shandong University, Qingdao, China

<sup>2</sup> Advanced Research Center for Optics, Shandong University, Qingdao, China

\* Correspondence:

Mingyu Wang [wangmingyu@sdu.edu.cn](mailto:wangmingyu@sdu.edu.cn), Hai Xu [haixu@sdu.edu.cn](mailto:haixu@sdu.edu.cn).

## 1 SUPPLEMENTARY DATA

## 2 SUPPLEMENTARY TABLES AND FIGURES

### 2.1 Figures

**Figure S1.** Model of the site-specific integration and excision of SGI1. Black arrows represent chromosomal genes of *P. mirabilis*. SGI1 is represented in grey rectangle. SGI1 integrates specifically at the 3' end of the chromosomal *trmE* gene (*attB*). The direct repeats (DR-L/DR-R) are formed by the recombination between the chromosomal *attB* site and the SGI1 *attP* site. Primers (circ1/circ2) used for detection of the circular SGI1 form are indicated by horizontal arrows.

**Figure S2.** Detection of SGI1 and circular extrachromosomal form of SGI1, (A) Lane1-6, left junction by PmLJ1/LJR1(JN16, JN29, JN47, JN40, JN48, N); Lane7-12, S026 (JN16, JN29, JN47, JN40, JN48, N); Lane13-18, right junction by 104-RJ/PmRJ1 (JN16, JN29, JN47, JN40, JN48, N), (B) Lane1-3, right junction by 104-RJ/hipA-R1 (JN40, JN48, N); Lane 4-6, right junction by 104-RJ/MP-R1 (JN40, JN48, N); Lane7-12, S044 (JN16, JN29, JN47, JN40, JN48, N); Lane13-18, circular extrachromosomal form of SGI1 by circ1/circ2 (JN16, JN29, JN47, JN40, JN48, N). N, negative control; M, marker.

**Figure S3.** Resistance of *P. mirabilis* JN16 and JN48 to chromate.

**Figure S4.** Detection of pR55 and SGI1 in transconjugants. (A) Lane 1-4, *parA* of pR55 in *P. mirabilis* (JN29, JN40, JN47, JN48); Lane 5-8, *xis* of SGI1s in transconjugants (SGI1-*PmCAU*, SGI1-*PmABB*, SGI1-*PmJN40*, SGI1-*PmJN48*); Lane 9-12, S044 of SGI1s in transconjugants (SGI1-*PmCAU*, SGI1-*PmABB*, SGI1-*PmJN40*, SGI1-*PmJN48*). (B) Lane 1-3, *orf4*, *orf16*, and *orf17* of SGI1-*PmJN40*; Lane 4-6, PMI3015, PMI3046, and *chrA* of SGI1-*PmJN48*. P, positive control; N, negative control; M, marker (2000bp, 1500bp, 1000bp, 750bp, 500bp, 250bp, 100bp).

### 2.2 Tables

**Table S1.** Primers used for PCR in this study.

| Primer                                | Sequence (5'-3')      | Target gene | Reference    |
|---------------------------------------|-----------------------|-------------|--------------|
| <b>Detection and location of SGI1</b> |                       |             |              |
| PmLJ1                                 | ACACCTACAACAAGGCTATC  | <i>thdF</i> | (Boyd, 2007) |
| LJ-R1                                 | AGTTCTAAAGGTTCGTAGTCG | <i>int</i>  | (Boyd, 2001) |
| 104-RJ                                | TGACGAGCTGAAGCGAATTG  | S044        | (Boyd, 2001) |
| PmRJ1                                 | GATGCACACTGAGTTGATAG  | <i>hipB</i> | (Boyd, 2007) |

|                               |                     |                     |                             |
|-------------------------------|---------------------|---------------------|-----------------------------|
| hipA-R1                       | GCCGCTAATAGGTCAAAGG | <i>hipA</i>         | (Bi, 2011)                  |
| MP-R1                         | CCCAAATGGCAGAAAGAAT | PMI3124             | (Bi, 2011)                  |
| S026-F                        | TGGCTACTGCGGAACAAC  | S026                | this study                  |
| S026-R                        | TACCTGACTGCCTTCTAG  |                     |                             |
| S044-F                        | AGCATTTCCGATGATGTG  | S044                | this study                  |
| S044-R                        | TTCTCCCTGATCTTCATC  |                     |                             |
| Mapping of the SGI1 backbones |                     |                     |                             |
| intSGI1-F                     | GGTATCAGTAAACAAGCG  | <i>int</i> -S005    | (Siebor and Neuwirth, 2013) |
| S005-outF                     | CACTCTCTCGAATCATCC  |                     |                             |
| rep-outR                      | CGACTTGGCACATGATTG  | <i>rep</i> -S005    | (Siebor and Neuwirth, 2013) |
| S005-F                        | CATGACGAGGTTTGTTGC  |                     |                             |
| S005-R                        | GTTTAACGATGCGGGATC  | S005-S010           | (Siebor and Neuwirth, 2013) |
| S010-F                        | CGAGCTGAATATAGACGC  |                     |                             |
| S010-R                        | CGGATACCGTTGAGGCGA  | S010-S011           | (Siebor and Neuwirth, 2013) |
| S011-F                        | TTATTCCGTCTGGTGATGC |                     |                             |
| S011-outR                     | ATACACGAGCCAACAAGC  | S011-S014           | (Siebor and Neuwirth, 2013) |
| S014-R                        | AGATGATCGGACATAGCG  |                     |                             |
| S014-F                        | TGAGTCTGTGGCATGAAG  | S014-S020           | (Siebor and Neuwirth, 2013) |
| S020-mF                       | TCTGCGGTTTCGAGGAATC |                     |                             |
| S020-R                        | GTTTGAGCGTAGTGGTGC  | S020-S024           | (Siebor and Neuwirth, 2013) |
| S024-outF                     | GGCTCATACCAATACAGC  |                     |                             |
| S024-R                        | ATGATCCTGGCATGTTCG  | S024-S025           | (Siebor and Neuwirth, 2013) |
| S025-mF                       | TCTTGGGATCCTGATTGG  |                     |                             |
| S025-R                        | CACTCTATTTTCCCACCG  | S025-S026           | (Siebor and Neuwirth, 2013) |
| S026-F                        | TGGCTACTGCGGAACAAC  |                     |                             |
| Mapping of the MDR regions    |                     |                     |                             |
| S026-outR                     | CAACCTGAAGGGCAACAG  | S026- <i>aadA2</i>  | (Siebor and Neuwirth, 2013) |
| aadA2-R                       | CTCGCCTTTCACAAAGCG  |                     |                             |
| aadA2-outF                    | ATAAAACGCCTACCTGCC  | <i>aadA2</i> -S044  | (Siebor and Neuwirth, 2013) |
| S044-outR                     | TCGCTCGATAACTCTCTC  |                     |                             |
| S026-outR                     | CAACCTGAAGGGCAACAG  | S026- <i>dfrA1</i>  | (Siebor and Neuwirth, 2013) |
| dfrA1-R                       | ACCCTTTTGCCAGATTTG  |                     |                             |
| orfC-outF                     | TGGTTCCTGCTTGATTCTG | <i>orfC</i> -S044   | (Siebor and Neuwirth, 2013) |
| S044-outR                     | TCGCTCGATAACTCTCTC  |                     |                             |
| S026-outR                     | CAACCTGAAGGGCAACAG  | S026- <i>aacCA5</i> | (Siebor and Neuwirth, 2013) |
| aacCA5-R                      | TTTACTCTGCTCAACCGC  |                     |                             |
| aadA7-outF                    | CGCCAAAGGATGTTGCTG  | <i>aadA7</i> -S044  | (Siebor and Neuwirth, 2013) |
| S044-outR                     | TCGCTCGATAACTCTCTC  |                     |                             |
| S026-outR                     | CAACCTGAAGGGCAACAG  | S026-PSE1           | (Siebor and Neuwirth, 2013) |
| PSE1-R                        | CTTATCAGCGCGACTGTG  |                     |                             |

|                                                                |                      |                                  |                 |
|----------------------------------------------------------------|----------------------|----------------------------------|-----------------|
| PSE1-outF                                                      | TACAGCAGTTGTGTGGAG   | <i>bla</i> <sub>PSE-1-S044</sub> | (Siebor and     |
| S044-outR                                                      | TCGCTCGATAACTCTCTC   |                                  | Neuwirth, 2013) |
| IS1359F                                                        | TGGGTCCACCACATTGATAC | <i>IS1359</i>                    | this study      |
| IS1359R                                                        | AAGGGAGATGGCTAAACGAA |                                  |                 |
| <b>Detection of the circular extrachromosomal form of SGI1</b> |                      |                                  |                 |
| circ1                                                          | AGCAAAATCGTGAGAAGGGA | <i>attP</i>                      | (Doublet, 2005) |
| circ2                                                          | TGATGAGACACCTGACGAGC |                                  |                 |
| <b>Detection of the plasmid R55</b>                            |                      |                                  |                 |
| parAF                                                          | AAAAGTAATCAGCTTCGCCA | <i>parA</i>                      | this study      |
| parAR                                                          | TAGCCACCTTCTCTAATAG  |                                  |                 |
| <b>Detection of the transconjugants of SGI1s</b>               |                      |                                  |                 |
| xisF                                                           | TCAGGCGGTAGATGTATG   | <i>xis</i>                       | this study      |
| xisR                                                           | GAAAGTGACTGGCGGAAT   |                                  |                 |
| orf4F                                                          | TTTACATAGCGGCGAATC   | <i>orf4</i>                      | this study      |
| orf4R                                                          | TTAGCCAGTTTGAGCACC   |                                  |                 |
| orf16F                                                         | AGTGGAAGATGCCCCGTAG  | <i>orf16</i>                     | this study      |
| orf16R                                                         | ATGTGGTGAGCGATAAGC   |                                  |                 |
| orf17F                                                         | TCCAAAGAGTAAAGCCAGTA | <i>orf17</i>                     | this study      |
| orf17R                                                         | AGCAGGTAAGGTGCGATG   |                                  |                 |
| 3015F                                                          | ACACCACGCTCTGTTCCA   | PMI3015                          | this study      |
| 3015R                                                          | TGTTTATTCGCCCTACGC   |                                  |                 |
| 3046F                                                          | CTCTAAACGACCACCTAT   | PMI3046                          | this study      |
| 3046R                                                          | AAAGTCTCAGATGGCAAG   |                                  |                 |
| chrAF                                                          | TAACCCTACCGATGACAGCA | <i>chrA</i>                      | this study      |
| chrAR                                                          | GATAGCAATCACGCCAACC  |                                  |                 |

## References

- Bi, S., Yan, H., Chen, M., Zhang, Z., Shi, L., and Wang, H. (2011). New variant *Salmonella* genomic island 1-U in *Proteus mirabilis* clinical and food isolates from South China. *J. Antimicrob. Chemoth.* 66, 1178-1179. doi: 10.1093/jac/dkr030
- Boyd, D. A., Peters, G. A., Cloeckert, A., Boumedine, K. S., Chaslus-Dancla, E., Imberechts, H., et al. (2001). Complete nucleotide sequence of a 43-kilobase genomic island associated with the multidrug resistance region of *Salmonella enterica* serovar Typhimurium DT104 and its identification in phage type DT120 and serovar Agona. *J. Bacteriol.* 183, 5725-5732. doi: 10.1128/JB.183.19.5725-5732.2001
- Boyd, D. A., Shi, X., Hu, Q. H., Ng, L. K., Doublet, B., Cloeckert, A., et al. (2007). *Salmonella* Genomic Island 1 (SGI1), variant SGI1-I, and new variant SGI1-O in *Proteus mirabilis* clinical and food isolates from China. *Antimicrob. Agents.*

- Chemoth.* 52, 340-344. doi: 10.1128/AAC.00902-07
- Doublet, B., Boyd, D. A., Mulvey, M. R., and Cloeckert, A. (2005). The *Salmonella* genomic island 1 is an integrative mobilizable element. *Mol. Microbiol.* 55, 1911-1924. doi: 10.1111/j.1365-2958.2005.04520.x
- Siebor, E., and Neuwirth, C. (2013). Emergence of *Salmonella* genomic island 1 (SGI1) among *Proteus mirabilis* clinical isolates in Dijon, France. *J. Antimicrob. Chemoth.* 68, 1750-1756. doi: 10.1093/jac/dkt100
